# Supplementary material for: Towards higher scientific validity and regulatory acceptance of predictive models for PFAS
Source: Royal Society of Chemistry journal article supplement (doi:10.1039/d2gc04341f), 2023-01-01
Supplement: d2gc04341f2.xlsx [file d2gc04341f2.xlsx]

## Sheet: Introduction
Supplementary Information 1
Towards higher scientific validity and regulatory acceptance of predictive models for PFAS
Authors: Anita Sosnowska1*, Natalia Bulawska1, Dominika Kowalska1, Tomasz Puzyn1,2 *
1. QSAR Lab, ul. Trzy Lipy 3, Gdańsk, Poland
2. University of Gdansk, Faculty of Chemistry, Wita Stwosza 63, 80-308 Gdansk, Poland
* Corresponding authors.
E-mail address: t.puzyn@qsarlab.com, a.sosnowska@qsarlab.com

## Sheet: Table S1
Multiple linear regression model (OLS - Ordinary Least Square)
Endpoint	Split	Number of compounds in training set	Number of compounds in validation set	Dataset description
VP1	Split by SOM 31%	24	11	Dataset: 35 perfluorinated compounds: 8 carboxylic acids, 9 alifatic compounds (mainly substituted by F), 6 alcohols, 2 aromatic compounds, 3 cyclic compounds, 2 ketones, 2 sulfonamide, 3 other chemical compounds are not assigned to sets
	Random by activity 37,0%	22	13
	Full model	35	0
VP2	Split by SOM 31%	24	11	Dataset: 35 perfluorinated compounds: 8 carboxylic acids, 9 alifatic compounds (mainly substituted by F), 6 alcohols, 2 aromatic compounds, 3 cyclic compounds, 2 ketones, 2 sulfonamide, 3 other * External validation have been performed for 2 splitting methods, however chemical compounds are not assigned to sets
	Ordered response model 37,0%	22	13
	Full model	35	0
S1	Split by SOM 25%	15	5	Dataset: 20 perfluorinated compounds: 8 alifatic compounds, 2 aromatic (one with NH2 group), 1 cyclic compound, 4 alcohols, 3 carboxylic acids, 2 sulfonamide chemical compounds are not assigned to sets
	Random by activity 25,0%	15	5
	Full model	20	0
S2	Split by SOM 25%	15	5	Dataset: 20 perfluorinated compounds: 8 alifatic compounds, 2 aromatic (one with NH2 group), 1 cyclic compound, 4 alcohols, 3 carboxylic acids, 2 sulfonamide * External validation have been performed for 2 splitting methods, however chemical compounds are not assigned to sets
	Ordered response model 25,0%	15	5
	Full model	20	0
MP1	Split by SOM	53	41	Dataset: For MP, 94 compounds containing mainly long chain alkylates, saturated cyclic and few aromatic PFCs were split into training and prediction set close to 50% and 15 more compounds from PERFORCE were used as EV- set, chemical compounds are not assigned to sets
	Response splitting	48	46
	Full model	94	0
MP3	Split by SOM	53	41	Dataset: For MP, 94 compounds containing mainly long chain alkylates, saturated cyclic and few aromatic PFCs were split into training and prediction set close to 50% and 15 more compounds from PERFORCE were used as EV- set, chemical compounds are not assigned to sets
	Response splitting	48	46
	Full model	94	0
BP1	Split by SOM	50	43	Dataset: For BP, 93 compounds containing mainly long chain alkylates, saturated cyclic and few aromatic PFCs were split into training and prediction set close to 50% and 25 more compounds from PERFORCE were used as EV- set, chemical compounds are not assigned to sets
	Response splitting	47	46
	Full model	93	0
BP3	Split by SOM	50	43	Dataset: For BP, 93 compounds containing mainly long chain alkylates, saturated cyclic and few aromatic PFCs were split into training and prediction set close to 50% and 25 more compounds from PERFORCE were used as EV- set, chemical compounds are not assigned to sets
	Response splitting	47	46
	Full model	93	0
CMC	Full model	10	0	Dataset: 10 perfluorinated compounds: 9 carboxylic acids (4-10 at C), 1 sulfonic acid; full model
DF	Division into training and test sets in a ratio of approximately 4:1	29	9	Dataset: 38 PFAS with different headgroups and chain lengths: 10 PFCA [F(CF2)nCOOH], 8 PFdiCA [COOH(CF2)nCOOH], 8 FTCA [F(CF2)n(CH2)2COOH], 4 PFSA [F(CF2)nSO3H], 8 PFECA {3 CF3CF2[CF2OCF(CF3)]nCOOH, 3 CF3O- (CF2)nCOOH, and 2 CF3O(CF2CF2O)nCF2COOH},
CFDE	Random Split	414	152	Dataset: 564 unique C–F bond dissociation energies, 414 randomly chosen C−F bonds were utilized in the training set, chemical compounds are not assigned to sets.
LC50 (1)	Split by SOM 28,5%	40	16	Dataset: 56 perfluorinated compounds; Only compounds with organic backbones were included in the data set, Hydrates, ions, dimers, complex mixtures, and salts of the perfluorinated chemicals were not considered, 56: 25 alifatic compounds, 5 alcohols, 5 aromatic, 3 carboxylic acids, 1 ketone, 7 ethers, 4 amines, 2 cyclic compounds, 4 others * External validation have been performed for 2 splitting…
	Response splitting 20%	44	12
	Full model	56	0
LC50 (2)	Split by SOM 18,9%	42	10	Dataset: 52 perfluorinated compounds; Only compounds with organic backbones were included in the data set, Hydrates, ions, dimers, complex mixtures, and salts of the perfluorinated chemicals were not considered, 52: 22 alifatic compounds, 2 alcohols, 2 carboxylic acids, 4 ketones, 8 aromatic compounds, 2 nitryle, 5 ethers, 1 cyclic compound, 6 other * External validation have been performed for 2…
	Response splitting 20%	42	10
	Full model	52	0
LC50 (3)	Split by SOM 28,5%	40	16	Dataset: 56 perfluorinated compounds; Only compounds with organic backbones were included in the data set, Hydrates, ions, dimers, complex mixtures, and salts of the perfluorinated chemicals were not considered, 56: 25 alifatic compounds, 5 alcohols, 5 aromatic, 3 carboxylic acids, 1 ketone, 7 ethers, 4 amines, 2 cyclo compounds, 4 others chemical compounds are not assigned to sets
	Random by activity 20%	44	12
	Full model	56	0
LC50 (4)	Split by SOM 18,9%	42	10	Dataset: 52 perfluorinated compounds; Only compounds with organic backbones were included in the data set, Hydrates, ions, dimers, complex mixtures, and salts of the perfluorinated chemicals were not considered, 52: 22 alifatic compounds, 2 alcohols, 2 carboxylic acids, 4 ketones, 8 aromatic compounds, 2 nitryle, 5 ethers, 1 cyclic compound, 6 other chemical compounds are not assigned to sets
	Random by activity 20%	42	10
	Full model	52	0
LD50 (1)	Split by SOM 28%	36	14	Dataset: 50 PFCs, Data set includes simple and complex compunds, for example carboxylic acids, sulfonic acids, alcohols, chlorine derivatives, bromine derivatives, aromatic PFAS, perfluoroamines, eters, esters, sulfonamides, nitrogen derivatives, * External validation have been performed for 2 splitting methods, however chemical compounds are not assigned to sets
	Response splitting 26%	37	13
	Full model	50	0
LD50 (2)	Split by SOM 28%	36	14	Dataset: 50 PFCs, Data set includes simple and complex compunds, for example carboxylic acids, sulfonic acids, alcohols, chlorine derivatives, bromine derivatives, aromatic PFAS, perfluoroamines, eters, esters, sulfonamides, nitrogen derivatives, chemical compounds are not assigned to sets
	Random by activity 26%	37	13
	Full model	50	0
LD50 (3)	Split by SOM 28%	36	22	Dataset: 58 PFCs Data set includes simple and complex compunds, for example carboxylic acids, alcohols, chlorine derivatives, bromine derivatives, nitrogen derivatives, aromatic PFAS, perfluoroamines, eters, esters, sulfonamides, bicyclo compunds, chemical compounds are not assigned to sets
	Random by activity 26%	37	19
	Full model	58	0
IC50 (1)	Activity Sorted Response	12	6	Dataset: 4 single PFAS (PFOA, PFOS, PFHxA,PFHxS) and 14 binary mixtures Training set: PFO,PFOS,PFHxA and 9 binary mixtures Validation set: PFHxS and 5 binary mixtures
	Euclidean distance based approach	12	6
	Modified k-medoid	12	6
IC50 (2)	Activity Sorted Response Division (1)	6	3	Dataset: 5 single PFAS (TBBPA, TDCPP, PFOA, DOPO, PFBA) and 4 trietary mixtures (1)Traning set: TDCPP, DOPO,PFBA, three trietary mixtures, Validation set: TBBPA,PFOA,1 trietary mixture, (2) Traning set: TBBPA,TDCPP,PFOA,PFBA, 2 trietary mixtures, Validation set: DOPO, 2 trietary mixtures , (3) Traning set: TDCPP, PFOA, DOPO, PFBA, 2 trietary mixtures, Validation set: TBBPA, 2 trietary mixtures , …
	Euclidean distance based approach (2)	6	3
	Kenard Stone Method (3)	6	3
	Modified k-medoid (4)	6	3
EC50 (3)	Full model	14	0	Dataset: 14 PFAS: 2 salts, 11 carboxylic acids, 1 alcohol
EC50 (4)	Full model	10	0	Dataset: 10 PFAS: 1 salt, 9 acids
LC50 (5)	Full model	10	0	Dataset: 10 PFAS: 1 salt, 2 sulfonates, 7 acids
LC50 (6)	Full model	12	0	Dataset: 12 PFAS: 7 acids, 3 salts, 1 fluorotelomer alcohol,
Simple linear regression model
VP3	Full model	10	0	Dataset: 10 perfluorinated compounds: 7 perfluorinated carboxylic acids (PFCAs), 1 perfluorinated sulfonic acids (PFSAs), and 2 fluorotelomer alcohols (FTOHs)
S3	Full model	7	0	Dataset: 7 perfluorinated compounds: 2 perfluorinated carboxylic acids (PFCAs), 1 perfluorinated sulfonic acids (PFSAs), and 4 fluorotelomer alcohols (FTOHs)
Kow	Full model	9	0	Dataset: 9 perfluorinated compounds: 9 perfluorinated carboxylic acids (PFCAs)
Kaw	Full model	7	0	Dataset: 7 perfluorinated compounds: 5 perfluorinated carboxylic acids (PFCAs) and 2 perfluorinated sulfonic acids (PFSAs)
Koa	Full model	8	0	Dataset: 8 perfluorinated compounds: 5 perfluorinated sulfonic acids (PFSAs) and 3 fluorotelomer alcohols (FTOHs)
Ki	Full model	15	0	Dataset: Training set: 10 PFCAs and 5 PFSAs , External independent validation set: 39 PFAS: 2 branched PFAS, 15 poly-PFAS (of which three are cationic rather than anionic, and another three are branched), 8 nonionic PFAS, and 2 alcohols, 4 hydrocarbons, and 8 Oil-Water,
EC50 (1)	Full model	7	0	Dataset: 5 PFAS: PFBA, 5H 4:1 FTOH, PFOA, PFNA, PFDA, PFUnA, PFDoA,
EC50 (2)	Full model	7	0	Dataset: 5 PFAS: PFBA, 5H 4:1 FTOH, PFOA, PFNA, PFDA, PFUnA, PFDoA,
Partial least-squares (PLS) regression
VP4	Random split 20%	831	207	Dataset: Final model 831 data points in training set, 207 data points in validation set (VP - different temperatures), 42 PFCs: 4 for FTOH, 4 acohols, 8 carboxylic acids, 1 ether, 20 alifatic compounds, 3 cyclic compounds, 2 aromatic compounds All compounds were included in both sets with a distribution by temperature, the exact split is attached in the publication supplement,
MP2	Split by SOM	53	41	Dataset: For MP, 94 compounds containing mainly long chain alkylates, saturated cyclic and few aromatic PFCs were split into training and prediction set close to 50% and 15 more compounds from PERFORCE were used as EV- set, chemical compounds are not assigned to sets
	Response splitting	48	46
	Full model	94	0
BP2	Split by SOM	50	43	Dataset: For BP, 93 compounds containing mainly long chain alkylates, saturated cyclic and few aromatic PFCs were split into training and prediction set close to 50% and 25 more compounds from PERFORCE were used as EV- set, chemical compounds are not assigned to sets
	Response splitting	47	46
	Full model	93	0
IC50 (3)	Full model	15	0	15 PFAS with IC50 experimental data: Carboxylic acids n=6-12,14, H-saturated carboxylic acids, Sulfonatess n=4,6,8, L-PFOSi, FOSA,
Associative neural networks (ASNN)
BP4	Split by SOM	50	43	Dataset: For BP, 93 compounds containing mainly long chain alkylates, saturated cyclic and few aromatic PFCs were split into training and prediction set close to 50% and 25 more compounds from PERFORCE were used as EV- set, chemical compounds are not assigned to sets
	Response splitting	47	46
	Full model	93	0
MP4	Split by SOM	53	40	Dataset: For MP, 93 compounds containing mainly long chain alkylates, saturated cyclic and few aromatic PFCs were split into training and prediction set close to 50% and 15 more compounds from PERFORCE were used as EV- set, chemical compounds are not assigned to sets
	Response splitting	47	46
	Full model	93	0
